# Supplementary material for: Quantitative phosphoproteomic analysis provides insights into the aluminum-responsiveness of Tamba black soybean
Source: PLoS One. 2020 Aug 19;15(8):e0237845. doi: 10.1371/journal.pone.0237845 (PMC7437914; doi:10.1371/journal.pone.0237845)
Supplement: S4 Table — (XLSX) [file pone.0237845.s009.xlsx]

## Sheet: Sheet1
S4 Table. KEGG pathway of differential phosphoproteins
Regulated Type	KEGG pathway	Protein accession	Position	Ratio	Protein description	proteinGroups Unique peptides	Modified sequence
All differential phosphoproteins	Spliceosome	Glyma.01G229700.1.p	771	0.824	PREDICTED: U4/U6 small nuclear ribonucleoprotein Prp3-like [Glycine max]	5	EKEENEDS(1)DDDKPANK
		Glyma.02G220800.1.p	201	0.798	PREDICTED: uncharacterized protein LOC100779321 isoform X1 [Glycine max]	5	ERS(0.929)Y(0.074)S(0.997)QHNR
		Glyma.02G220800.1.p	199	0.815	PREDICTED: uncharacterized protein LOC100779321 isoform X1 [Glycine max]	5	S(0.999)Y(0.035)S(0.966)QHNR
		Glyma.02G247800.1.p	180	0.826	PREDICTED: serine/arginine-rich SC35-like splicing factor SCL30 [Glycine max]	3	S(0.999)RS(0.983)Y(0.123)S(0.896)PAPR
		Glyma.03G017200.4.p	169	0.818	PREDICTED: serine/arginine-rich splicing factor RS41-like isoform X2 [Glycine max]	4	GS(0.002)PDY(0.998)GHGSNPSSRPEPR
		Glyma.05G117600.2.p	240	0.728	PREDICTED: serine/arginine-rich splicing factor SC35 isoform X2 [Glycine max]	2	EERS(1)PT(1)PRS(1)VS(1)PR
		Glyma.05G117600.2.p	259	0.781	PREDICTED: serine/arginine-rich splicing factor SC35 isoform X2 [Glycine max]	2	GRPDAS(1)RS(1)PS(1)PR
		Glyma.05G117600.2.p	185	0.604	PREDICTED: serine/arginine-rich splicing factor SC35 isoform X2 [Glycine max]	2	YDDERNS(1)R
		Glyma.05G117600.2.p	230	0.597	PREDICTED: serine/arginine-rich splicing factor SC35 isoform X2 [Glycine max]	2	GES(1)PANRS(1)R
		Glyma.05G117600.2.p	255	0.781	PREDICTED: serine/arginine-rich splicing factor SC35 isoform X2 [Glycine max]	2	GRPDAS(1)RS(1)PS(1)PR
		Glyma.05G117600.2.p	235	0.619	PREDICTED: serine/arginine-rich splicing factor SC35 isoform X2 [Glycine max]	2	GES(1)PANRS(1)R
		Glyma.05G117600.2.p	257	0.781	PREDICTED: serine/arginine-rich splicing factor SC35 isoform X2 [Glycine max]	2	GRPDAS(1)RS(1)PS(1)PR
		Glyma.05G117600.2.p	242	0.728	PREDICTED: serine/arginine-rich splicing factor SC35 isoform X2 [Glycine max]	2	EERS(1)PT(1)PRS(1)VS(1)PR
		Glyma.05G121100.1.p	89	0.792	uncharacterized protein LOC100815224 [Glycine max]	6	AQPQQGS(0.902)T(0.098)R
		Glyma.07G078300.6.p	192	0.795	PREDICTED: serine/arginine-rich splicing factor RS41-like isoform X2 [Glycine max]	4	AES(1)PINNGR
		Glyma.07G078300.6.p	169	0.819	PREDICTED: serine/arginine-rich splicing factor RS41-like isoform X2 [Glycine max]	4	GS(0.013)PDY(0.987)GHGSNPSSR
		Glyma.08G048400.1.p	1708	1.245	PREDICTED: THO complex subunit 2-like isoform X1 [Glycine max]	6	HSQRLS(1)PR
		Glyma.08G265300.6.p	605	0.832	PREDICTED: U2 snRNP-associated SURP motif-containing protein-like isoform X1 [Glycine max]	5	S(0.42)S(0.583)VPLS(0.949)PT(0.048)LPIAQPELK
		Glyma.10G239100.3.p	258	0.708	uncharacterized protein LOC100796509 [Glycine max]	3	EGS(1)EPVR
		Glyma.10G255700.2.p	729	0.743	PREDICTED: pre-mRNA-processing protein 40A-like isoform X1 [Glycine max]	4	RHS(0.927)S(0.08)GHES(0.993)DEGR
		Glyma.10G255700.2.p	734	0.743	PREDICTED: pre-mRNA-processing protein 40A-like isoform X1 [Glycine max]	4	RHSSGHES(1)DEGR
		Glyma.11G012200.4.p	198	0.791	PREDICTED: DEAD-box ATP-dependent RNA helicase 42-like [Glycine max]	2	KSEEHEGS(1)PR
		Glyma.11G067300.1.p	294	0.828	PREDICTED: U1 small nuclear ribonucleoprotein 70 kDa isoform X2 [Glycine max]	6	S(1)REHS(1)HER
		Glyma.11G067300.1.p	276	1.331	PREDICTED: U1 small nuclear ribonucleoprotein 70 kDa isoform X2 [Glycine max]	6	DREIS(1)RER
		Glyma.11G067300.1.p	290	0.828	PREDICTED: U1 small nuclear ribonucleoprotein 70 kDa isoform X2 [Glycine max]	6	S(1)REHS(1)HER
		Glyma.11G237500.2.p	472	0.75	PREDICTED: apoptotic chromatin condensation inducer in the nucleus-like isoform X2 [Glycine max]	9	GPDAQS(0.121)T(0.504)T(0.378)PRPAT(0.241)T(0.756)PR
		Glyma.12G181300.2.p	310	0.726	PREDICTED: splicing factor U2af small subunit B [Glycine max]	3	HHGHQQQEQEPQS(1)PQEGQ
		Glyma.12G181300.2.p	256	0.72	PREDICTED: splicing factor U2af small subunit B [Glycine max]	3	HHS(1)PVRDGS(1)EER
		Glyma.12G181300.2.p	262	0.72	PREDICTED: splicing factor U2af small subunit B [Glycine max]	3	HHS(1)PVRDGS(1)EER
		Glyma.12G206400.1.p	241	0.708	PREDICTED: uncharacterized protein LOC100789535 isoform X1 [Glycine max]	3	ESGDS(1)DDDEEDDR
		Glyma.13G294500.1.p	243	0.803	PREDICTED: nuclear cap-binding protein subunit 2-like [Glycine max]	4	ESGDS(1)DEDEEDDR
		Glyma.16G022300.7.p	221	0.784	PREDICTED: serine/arginine-rich splicing factor RS31 isoform X2 [Glycine max]	15	S(0.983)PDY(0.017)GKPR
		Glyma.16G022300.7.p	173	0.788	PREDICTED: serine/arginine-rich splicing factor RS31 isoform X2 [Glycine max]	15	RPS(0.996)PDY(0.004)GR
		Glyma.18G019700.1.p	477	0.75	PREDICTED: apoptotic chromatin condensation inducer in the nucleus-like [Glycine max]	7	GPDAQS(0.121)T(0.504)T(0.378)PRPAT(0.241)T(0.756)PR
		Glyma.19G006000.3.p	618	1.208	PREDICTED: DEAD-box ATP-dependent RNA helicase 46-like isoform X1 [Glycine max]	9	GRS(1)PDKGSSWSDR
		Glyma.19G217400.1.p	158	0.831	PREDICTED: DEAD-box ATP-dependent RNA helicase 24-like [Glycine max]	2	AVDAGMIEY(0.172)DS(0.828)DDNPIVIDK
	mRNA surveillance	Glyma.01G121400.3.p	660	0.742	PREDICTED: uncharacterized protein LOC100776979 isoform X2 [Glycine max]	2	SEELS(1)PK
		Glyma.08G172000.1.p	72	1.203	PREDICTED: serine/arginine-rich splicing factor SR45-like [Glycine max]	4	S(1)PADAAR
		Glyma.11G136000.1.p	627	0.726	PREDICTED: serine/arginine repetitive matrix protein 1-like [Glycine max]	11	T(0.002)QRPS(0.006)RDS(0.992)PDTR
		Glyma.11G237500.2.p	472	0.75	PREDICTED: apoptotic chromatin condensation inducer in the nucleus-like isoform X2 [Glycine max]	9	GPDAQS(0.121)T(0.504)T(0.378)PRPAT(0.241)T(0.756)PR
		Glyma.12G059700.1.p	604	0.814	PREDICTED: serine/arginine repetitive matrix protein 1-like [Glycine max]	11	T(0.017)QKPS(0.101)RDS(0.857)PDT(0.025)R
		Glyma.12G206400.1.p	241	0.708	PREDICTED: uncharacterized protein LOC100789535 isoform X1 [Glycine max]	3	ESGDS(1)DDDEEDDR
		Glyma.13G294500.1.p	243	0.803	PREDICTED: nuclear cap-binding protein subunit 2-like [Glycine max]	4	ESGDS(1)DEDEEDDR
		Glyma.15G255400.1.p	309	1.417	PREDICTED: serine/arginine-rich splicing factor SR45-like [Glycine max]	5	IRGS(1)PGR
		Glyma.15G255400.1.p	258	1.271	PREDICTED: serine/arginine-rich splicing factor SR45-like [Glycine max]	5	RADS(1)PVRR
		Glyma.15G255400.1.p	82	1.325	PREDICTED: serine/arginine-rich splicing factor SR45-like [Glycine max]	5	GRS(1)PPPQSK
		Glyma.18G019700.1.p	477	0.75	PREDICTED: apoptotic chromatin condensation inducer in the nucleus-like [Glycine max]	7	GPDAQS(0.121)T(0.504)T(0.378)PRPAT(0.241)T(0.756)PR
		Glyma.18G077400.1.p	542	0.814	PREDICTED: uncharacterized PE-PGRS family protein PE_PGRS46-like [Glycine max]	3	AGESSY(0.001)GEEAASDQQY(0.001)GEVS(0.997)HDR
		Glyma.18G081700.3.p	421	1.764	PREDICTED: heterogeneous nuclear ribonucleoprotein 1-like [Glycine max]	3	S(0.014)GS(0.96)GS(0.025)VYNNSAWR
		Glyma.18G081700.3.p	233	1.365	PREDICTED: heterogeneous nuclear ribonucleoprotein 1-like [Glycine max]	3	MDGRFS(1)PLTSGR
	RNA transport	Glyma.03G106500.1.p	575	0.771	PREDICTED: eukaryotic translation initiation factor 4G-like isoform X3 [Glycine max]	5	S(0.04)NS(0.96)LKDK
		Glyma.08G048400.1.p	1708	1.245	PREDICTED: THO complex subunit 2-like isoform X1 [Glycine max]	6	HSQRLS(1)PR
		Glyma.08G172000.1.p	72	1.203	PREDICTED: serine/arginine-rich splicing factor SR45-like [Glycine max]	4	S(1)PADAAR
		Glyma.08G340500.2.p	637	0.826	PREDICTED: eukaryotic translation initiation factor 4G-like isoform X2 [Glycine max]	7	S(0.025)NS(0.975)LKDNQK
		Glyma.11G136000.1.p	627	0.726	PREDICTED: serine/arginine repetitive matrix protein 1-like [Glycine max]	11	T(0.002)QRPS(0.006)RDS(0.992)PDTR
		Glyma.11G237500.2.p	472	0.75	PREDICTED: apoptotic chromatin condensation inducer in the nucleus-like isoform X2 [Glycine max]	9	GPDAQS(0.121)T(0.504)T(0.378)PRPAT(0.241)T(0.756)PR
		Glyma.12G059700.1.p	604	0.814	PREDICTED: serine/arginine repetitive matrix protein 1-like [Glycine max]	11	T(0.017)QKPS(0.101)RDS(0.857)PDT(0.025)R
		Glyma.12G206400.1.p	241	0.708	PREDICTED: uncharacterized protein LOC100789535 isoform X1 [Glycine max]	3	ESGDS(1)DDDEEDDR
		Glyma.13G294500.1.p	243	0.803	PREDICTED: nuclear cap-binding protein subunit 2-like [Glycine max]	4	ESGDS(1)DEDEEDDR
		Glyma.15G018900.1.p	51	0.826	uncharacterized protein LOC100783752 [Glycine max]	3	ENFGS(0.781)S(0.219)DLPPPPVFTLEDR
		Glyma.15G255400.1.p	309	1.417	PREDICTED: serine/arginine-rich splicing factor SR45-like [Glycine max]	5	IRGS(1)PGR
		Glyma.15G255400.1.p	258	1.271	PREDICTED: serine/arginine-rich splicing factor SR45-like [Glycine max]	5	RADS(1)PVRR
		Glyma.15G255400.1.p	82	1.325	PREDICTED: serine/arginine-rich splicing factor SR45-like [Glycine max]	5	GRS(1)PPPQSK
		Glyma.18G019700.1.p	477	0.75	PREDICTED: apoptotic chromatin condensation inducer in the nucleus-like [Glycine max]	7	GPDAQS(0.121)T(0.504)T(0.378)PRPAT(0.241)T(0.756)PR
Upregulated phosphoproteins	RNA degradation	Glyma.04G144300.1.p	488	1.205	"PREDICTED: enolase 1, chloroplastic-like [Glycine max]"	2	Y(0.197)AGET(0.007)FRS(0.796)P
		Glyma.08G171800.2.p	172	1.256	PREDICTED: uncharacterized protein LOC100812450 isoform X2 [Glycine max]	5	TS(0.004)S(0.996)YPEQQR
		Glyma.08G171800.2.p	250	1.468	PREDICTED: uncharacterized protein LOC100812450 isoform X2 [Glycine max]	5	FS(0.012)S(0.988)EPILVPK
		Glyma.08G337200.2.p	613	1.293	PREDICTED: enhancer of mRNA-decapping protein 4-like isoform X1 [Glycine max]	8	GIS(0.824)S(0.107)S(0.037)NT(0.033)EAK
		Glyma.08G337200.2.p	562	1.372	PREDICTED: enhancer of mRNA-decapping protein 4-like isoform X1 [Glycine max]	8	DPITVEGFHS(0.997)LDS(0.002)S(0.001)AGR
		Glyma.15G122400.2.p	874	1.388	PREDICTED: enhancer of mRNA-decapping protein 4-like [Glycine max]	2	LFYS(0.001)QAS(0.999)DLGIQMAR
		Glyma.18G072400.2.p	493	1.363	PREDICTED: enhancer of mRNA-decapping protein 4-like [Glycine max]	4	QGS(0.973)QQHPY(0.027)ADGK
	Endocytosis	Glyma.19G172700.1.p	176	1.363	PREDICTED: ADP-ribosylation factor GTPase-activating protein AGD7-like [Glycine max]	2	NQS(0.961)T(0.039)GDVR
		Glyma.08G186400.3.p	238	1.278	PREDICTED: phosphatidylinositol 4-phosphate 5-kinase 7 [Glycine max]	2	S(0.008)LS(0.992)ENMPVISR
		Glyma.11G139600.1.p	186	1.211	PREDICTED: epsin-3-like [Glycine max]	2	GIEGFGS(0.992)FS(0.008)HR
		Glyma.08G271700.1.p	341	1.413	PREDICTED: probable ADP-ribosylation factor GTPase-activating protein AGD8 isoform X1 [Glycine max]	2	FSGSS(0.001)AIS(0.964)S(0.035)ADLFGDSR
		Glyma.18G299500.1.p	216	1.209	PREDICTED: clathrin interactor EPSIN 2-like [Glycine max]	6	EWGNRDDDQHS(1)RDGDR
		Glyma.09G002100.1.p	816	1.202	PREDICTED: dynamin-2B-like isoform X1 [Glycine max]	2	QS(0.047)S(0.953)LLSK
		Glyma.09G002100.1.p	815	1.39	PREDICTED: dynamin-2B-like isoform X1 [Glycine max]	2	QS(0.777)S(0.222)LLSK
Downregulated phosphoproteins	Spliceosome	Glyma.01G229700.1.p	771	0.824	PREDICTED: U4/U6 small nuclear ribonucleoprotein Prp3-like [Glycine max]	5	EKEENEDS(1)DDDKPANK
		Glyma.02G220800.1.p	201	0.798	PREDICTED: uncharacterized protein LOC100779321 isoform X1 [Glycine max]	5	ERS(0.929)Y(0.074)S(0.997)QHNR
		Glyma.02G220800.1.p	199	0.815	PREDICTED: uncharacterized protein LOC100779321 isoform X1 [Glycine max]	5	S(0.999)Y(0.035)S(0.966)QHNR
		Glyma.02G247800.1.p	180	0.826	PREDICTED: serine/arginine-rich SC35-like splicing factor SCL30 [Glycine max]	3	S(0.999)RS(0.983)Y(0.123)S(0.896)PAPR
		Glyma.03G017200.4.p	169	0.818	PREDICTED: serine/arginine-rich splicing factor RS41-like isoform X2 [Glycine max]	4	GS(0.002)PDY(0.998)GHGSNPSSRPEPR
		Glyma.05G117600.2.p	240	0.728	PREDICTED: serine/arginine-rich splicing factor SC35 isoform X2 [Glycine max]	2	EERS(1)PT(1)PRS(1)VS(1)PR
		Glyma.05G117600.2.p	259	0.781	PREDICTED: serine/arginine-rich splicing factor SC35 isoform X2 [Glycine max]	2	GRPDAS(1)RS(1)PS(1)PR
		Glyma.05G117600.2.p	185	0.604	PREDICTED: serine/arginine-rich splicing factor SC35 isoform X2 [Glycine max]	2	YDDERNS(1)R
		Glyma.05G117600.2.p	230	0.597	PREDICTED: serine/arginine-rich splicing factor SC35 isoform X2 [Glycine max]	2	GES(1)PANRS(1)R
		Glyma.05G117600.2.p	255	0.781	PREDICTED: serine/arginine-rich splicing factor SC35 isoform X2 [Glycine max]	2	GRPDAS(1)RS(1)PS(1)PR
		Glyma.05G117600.2.p	235	0.619	PREDICTED: serine/arginine-rich splicing factor SC35 isoform X2 [Glycine max]	2	GES(1)PANRS(1)R
		Glyma.05G117600.2.p	257	0.781	PREDICTED: serine/arginine-rich splicing factor SC35 isoform X2 [Glycine max]	2	GRPDAS(1)RS(1)PS(1)PR
		Glyma.05G117600.2.p	242	0.728	PREDICTED: serine/arginine-rich splicing factor SC35 isoform X2 [Glycine max]	2	EERS(1)PT(1)PRS(1)VS(1)PR
		Glyma.05G121100.1.p	89	0.792	uncharacterized protein LOC100815224 [Glycine max]	6	AQPQQGS(0.902)T(0.098)R
		Glyma.07G078300.6.p	192	0.795	PREDICTED: serine/arginine-rich splicing factor RS41-like isoform X2 [Glycine max]	4	AES(1)PINNGR
		Glyma.07G078300.6.p	169	0.819	PREDICTED: serine/arginine-rich splicing factor RS41-like isoform X2 [Glycine max]	4	GS(0.013)PDY(0.987)GHGSNPSSR
		Glyma.08G265300.6.p	605	0.832	PREDICTED: U2 snRNP-associated SURP motif-containing protein-like isoform X1 [Glycine max]	5	S(0.42)S(0.583)VPLS(0.949)PT(0.048)LPIAQPELK
		Glyma.10G239100.3.p	258	0.708	uncharacterized protein LOC100796509 [Glycine max]	3	EGS(1)EPVR
		Glyma.10G255700.2.p	729	0.743	PREDICTED: pre-mRNA-processing protein 40A-like isoform X1 [Glycine max]	4	RHS(0.927)S(0.08)GHES(0.993)DEGR
		Glyma.10G255700.2.p	734	0.743	PREDICTED: pre-mRNA-processing protein 40A-like isoform X1 [Glycine max]	4	RHSSGHES(1)DEGR
		Glyma.11G012200.4.p	198	0.791	PREDICTED: DEAD-box ATP-dependent RNA helicase 42-like [Glycine max]	2	KSEEHEGS(1)PR
		Glyma.11G067300.1.p	294	0.828	PREDICTED: U1 small nuclear ribonucleoprotein 70 kDa isoform X2 [Glycine max]	6	S(1)REHS(1)HER
		Glyma.11G067300.1.p	290	0.828	PREDICTED: U1 small nuclear ribonucleoprotein 70 kDa isoform X2 [Glycine max]	6	S(1)REHS(1)HER
		Glyma.11G237500.2.p	472	0.75	PREDICTED: apoptotic chromatin condensation inducer in the nucleus-like isoform X2 [Glycine max]	9	GPDAQS(0.121)T(0.504)T(0.378)PRPAT(0.241)T(0.756)PR
		Glyma.12G181300.2.p	310	0.726	PREDICTED: splicing factor U2af small subunit B [Glycine max]	3	HHGHQQQEQEPQS(1)PQEGQ
		Glyma.12G181300.2.p	256	0.72	PREDICTED: splicing factor U2af small subunit B [Glycine max]	3	HHS(1)PVRDGS(1)EER
		Glyma.12G181300.2.p	262	0.72	PREDICTED: splicing factor U2af small subunit B [Glycine max]	3	HHS(1)PVRDGS(1)EER
		Glyma.12G206400.1.p	241	0.708	PREDICTED: uncharacterized protein LOC100789535 isoform X1 [Glycine max]	3	ESGDS(1)DDDEEDDR
		Glyma.13G294500.1.p	243	0.803	PREDICTED: nuclear cap-binding protein subunit 2-like [Glycine max]	4	ESGDS(1)DEDEEDDR
		Glyma.16G022300.7.p	221	0.784	PREDICTED: serine/arginine-rich splicing factor RS31 isoform X2 [Glycine max]	15	S(0.983)PDY(0.017)GKPR
		Glyma.16G022300.7.p	173	0.788	PREDICTED: serine/arginine-rich splicing factor RS31 isoform X2 [Glycine max]	15	RPS(0.996)PDY(0.004)GR
		Glyma.18G019700.1.p	477	0.75	PREDICTED: apoptotic chromatin condensation inducer in the nucleus-like [Glycine max]	7	GPDAQS(0.121)T(0.504)T(0.378)PRPAT(0.241)T(0.756)PR
		Glyma.19G217400.1.p	158	0.831	PREDICTED: DEAD-box ATP-dependent RNA helicase 24-like [Glycine max]	2	AVDAGMIEY(0.172)DS(0.828)DDNPIVIDK
	RNA transport	Glyma.03G106500.1.p	575	0.771	PREDICTED: eukaryotic translation initiation factor 4G-like isoform X3 [Glycine max]	5	S(0.04)NS(0.96)LKDK
		Glyma.08G340500.2.p	637	0.826	PREDICTED: eukaryotic translation initiation factor 4G-like isoform X2 [Glycine max]	7	S(0.025)NS(0.975)LKDNQK
		Glyma.11G136000.1.p	627	0.726	PREDICTED: serine/arginine repetitive matrix protein 1-like [Glycine max]	11	T(0.002)QRPS(0.006)RDS(0.992)PDTR
		Glyma.11G237500.2.p	472	0.75	PREDICTED: apoptotic chromatin condensation inducer in the nucleus-like isoform X2 [Glycine max]	9	GPDAQS(0.121)T(0.504)T(0.378)PRPAT(0.241)T(0.756)PR
		Glyma.12G059700.1.p	604	0.814	PREDICTED: serine/arginine repetitive matrix protein 1-like [Glycine max]	11	T(0.017)QKPS(0.101)RDS(0.857)PDT(0.025)R
		Glyma.12G206400.1.p	241	0.708	PREDICTED: uncharacterized protein LOC100789535 isoform X1 [Glycine max]	3	ESGDS(1)DDDEEDDR
		Glyma.13G294500.1.p	243	0.803	PREDICTED: nuclear cap-binding protein subunit 2-like [Glycine max]	4	ESGDS(1)DEDEEDDR
		Glyma.15G018900.1.p	51	0.826	uncharacterized protein LOC100783752 [Glycine max]	3	ENFGS(0.781)S(0.219)DLPPPPVFTLEDR
		Glyma.18G019700.1.p	477	0.75	PREDICTED: apoptotic chromatin condensation inducer in the nucleus-like [Glycine max]	7	GPDAQS(0.121)T(0.504)T(0.378)PRPAT(0.241)T(0.756)PR
	mRNA surveillance pathway	Glyma.01G121400.3.p	660	0.742	PREDICTED: uncharacterized protein LOC100776979 isoform X2 [Glycine max]	2	SEELS(1)PK
		Glyma.11G136000.1.p	627	0.726	PREDICTED: serine/arginine repetitive matrix protein 1-like [Glycine max]	11	T(0.002)QRPS(0.006)RDS(0.992)PDTR
		Glyma.11G237500.2.p	472	0.75	PREDICTED: apoptotic chromatin condensation inducer in the nucleus-like isoform X2 [Glycine max]	9	GPDAQS(0.121)T(0.504)T(0.378)PRPAT(0.241)T(0.756)PR
		Glyma.12G059700.1.p	604	0.814	PREDICTED: serine/arginine repetitive matrix protein 1-like [Glycine max]	11	T(0.017)QKPS(0.101)RDS(0.857)PDT(0.025)R
		Glyma.12G206400.1.p	241	0.708	PREDICTED: uncharacterized protein LOC100789535 isoform X1 [Glycine max]	3	ESGDS(1)DDDEEDDR
		Glyma.13G294500.1.p	243	0.803	PREDICTED: nuclear cap-binding protein subunit 2-like [Glycine max]	4	ESGDS(1)DEDEEDDR
		Glyma.18G019700.1.p	477	0.75	PREDICTED: apoptotic chromatin condensation inducer in the nucleus-like [Glycine max]	7	GPDAQS(0.121)T(0.504)T(0.378)PRPAT(0.241)T(0.756)PR
		Glyma.18G077400.1.p	542	0.814	PREDICTED: uncharacterized PE-PGRS family protein PE_PGRS46-like [Glycine max]	3	AGESSY(0.001)GEEAASDQQY(0.001)GEVS(0.997)HDR
